# Supplementary material for: Identification of JUN gene and cellular microenvironment in response to PD-1 blockade treatment in lung cancer patients via single-cell RNA sequencing
Source: publisher site journal article supplement (doi:10.18632/aging.205932), 2024-06-13
Supplement: Supplementary file [file aging-v16i12-205932-supplementary-material-SD1.pdf]

## SUPPLEMENTARY TABLES

**Supplementary Table 1. Clinical characteristics of patients enrolled in this study.**

| New name    | Primary sample name | Patients ID | Age | Gender | Tumor type | Treatment                                | Response | Treatment Hx  | Biopsy site       | Timepoint |
|-------------|---------------------|-------------|-----|--------|------------|------------------------------------------|----------|---------------|-------------------|-----------|
| A01_ut_meta | P010.pre.01         | P010        | 53  | Male   | LUAD       | Pembrolizumab + Carboplatin + Pemetrexed | Yes      | Pre-treatment | LN metastasis     | A01pre    |
| A02_ut_meta | P019.pre.01         | P019        | 73  | Female | LUAD       | Pembrolizumab + Carboplatin + Pemetrexed | Yes      | Pre-treatment | LN metastasis     | A02pre    |
| A01_tr_meta | P010.post.01        | P010        | 53  | Male   | LUAD       | Pembrolizumab + Carboplatin + Pemetrexed | Yes      | On treatment  | LN metastasis     | A01post   |
| A02_tr_meta | P019.post.01        | P019        | 73  | Female | LUAD       | Pembrolizumab + Carboplatin + Pemetrexed | Yes      | On treatment  | LN metastasis     | A02post   |
| B01_ut_meta | P001.pre.01         | P001        | 57  | Female | LUAD       | Pembrolizumab + Carboplatin + Pemetrexed | Yes      | Pre-treatment | LN metastasis     | B01pre    |
| B02_ut_meta | P013.pre.01         | P013        | 61  | Female | LUAD       | Pembrolizumab + Carboplatin + Pemetrexed | Yes      | Pre-treatment | Liver metastasis  | B02pre    |
| B02_tr_meta | P001.post.03        | P001        | 57  | Female | LUAD       | Pembrolizumab + Carboplatin + Pemetrexed | No       | On treatment  | Right lung tumour | B02post   |
| B02_tr_meta | P013.post.03        | P013        | 61  | Female | LUAD       | Pembrolizumab + Carboplatin + Pemetrexed | No       | On treatment  | LN metastasis     | B02post   |
| C01_ut_pri  | P029.pre.01         | P029        | 52  | Male   | LUAD       | Pembrolizumab + Carboplatin + Pemetrexed | Yes      | Pre-treatment | Left lung tumour  | C01pre    |
| C02_ut_pri  | P030.pre.01         | P030        | 65  | Male   | LUAD       | Pembrolizumab + Carboplatin + Pemetrexed | Yes      | Pre-treatment | Right lung tumour | C02pre    |
| C03_ut_pri  | P033.pre.01         | P033        | 48  | Male   | LUAD       | Pembrolizumab + Carboplatin + Pemetrexed | Yes      | Pre-treatment | Right lung tumour | C03pre    |
| C04_ut_pri  | P035.pre.01         | P035        | 71  | Male   | LUAD       | Pembrolizumab + Carboplatin + Pemetrexed | Yes      | Pre-treatment | Right lung tumour | C04pre    |
| C01_tr_pri  | P029.post.01        | P029        | 52  | Male   | LUAD       | Pembrolizumab + Carboplatin + Pemetrexed | Yes      | On treatment  | Left lung tumour  | C01post   |
| C02_tr_pri  | P030.post.01        | P030        | 65  | Male   | LUAD       | Pembrolizumab + Carboplatin + Pemetrexed | Yes      | On treatment  | Right lung tumour | C02post   |
| C03_tr_pri  | P033.post.01        | P033        | 48  | Male   | LUAD       | Pembrolizumab + Carboplatin + Pemetrexed | Yes      | On treatment  | Right lung tumour | C03post   |
| C04_tr_pri  | P035.post.01        | P035        | 71  | Male   | LUAD       | Pembrolizumab + Carboplatin + Pemetrexed | Yes      | On treatment  | Right lung tumour | C04post   |

Clinical information from the original text, reorganize and number it. Among them, Pre treatment is defined as Pre for the untreated group, and On treatment is defined as Pos for the treatment group.

**Supplementary Table 2. Bulk-RNAseq validation.**

| Grouped       | Response | Patient ID     | Hospital ID | Gender | Age | Pathological type (before surgery) | Biopsy     |
|---------------|----------|----------------|-------------|--------|-----|------------------------------------|------------|
| Good Response | MPR      | A618_139_T_MPR | 161891      | male   | 66  | LUAD                               | right lung |
| Poor Response | SD       | A618_111_TSD   | 160929      | male   | 64  | LUAD                               | left lung  |
| Poor Response | SD       | A618_114_TSD   | 156260      | male   | 47  | LUAD                               | right lung |
| Good Response | pCR      | A618_88_T_pCR  | 157558      | male   | 73  | LUAD                               | left lung  |
| Good Response | MPR      | A618_59_T_MPR  | 155967      | male   | 69  | LUAD                               | left lung  |
| Poor Response | SD       | A618_101_TSD   | 152870      | male   | 65  | LUAD                               | left lung  |
| Poor Response | SD       | A618_128_TSD   | 157955      | male   | 45  | LUAD                               | right lung |
| Poor Response | SD       | A618_91_TSD    | 158496      | male   | 55  | LUAD                               | left lung  |
| Poor Response | SD       | A618_106_TSD   | 157780      | male   | 65  | LUAD                               | right lung |
| Good Response | MPR      | A618_62_T_MPR  | 157416      | male   | 69  | LUAD                               | right lung |
| Good Response | pCR      | A618_71_T_pCR  | 154853      | male   | 56  | LUAD                               | right lung |
| Good Response | pCR      | A618_96_T_pCR  | 158459      | male   | 67  | LUAD                               | right lung |
| Good Response | pCR      | A618_103_T_pCR | 159844      | male   | 75  | LUAD                               | left lung  |
| Good Response | MPR      | A618_136_T_MPR | 157786      | male   | 55  | LUAD                               | right lung |
| Poor Response | SD       | A618_47_TSD    | 152297      | female | 65  | LUAD                               | left lung  |
| Poor Response | SD       | A618_125_TSD   | 156386      | female | 72  | LUAD                               | right lung |
| Poor Response | SD       | A618_44_TSD    | 152560      | male   | 56  | LUAD                               | right lung |

Bulk RNA-seq data analysis, in which PCR (complete pathological response) and MPR (significant pathological response) are defined as good responses. SD (stable disease), PD (progressive disease) are defined as adverse reactions.

**Supplementary Table 3. IHC validation.**

| Pathology number | SEX    | Age | Prognosis |
|------------------|--------|-----|-----------|
| B2101862         | female | 55  | PR        |
| B2108744         | male   | 75  | PR        |
| B2113067         | male   | 76  | SD        |
| B2100531         | male   | 63  | PR        |
| B2006179         | male   | 66  | PR        |
| B2001556         | female | 50  | SD        |
| B2002417         | male   | 53  | invalid   |
| B2104352         | male   | 71  | PR        |
| B2202174         | male   | 72  | PR        |
| B2007434         | male   | 72  | PR        |
| B2004459         | male   | 40  | PR        |
| B2203394         | male   | 74  | PR        |
| B2215850         | female | 61  | invalid   |
| B1810548         | male   | 58  | PR        |
| B2202570         | male   | 65  | PR        |
| B2206675         | female | 70  | SD        |
| B2101407         | male   | 57  | PR        |
| B2106387         | male   | 65  | PR        |

18 case slices from Tongren Hospital were subjected to IHC histochemical staining experiments, PR (pathological response). SD (stable disease), invalid (invalid group).
